# Supplementary material for: (De)lithiation of spinel ferrites Fe3O4, MgFe2O4, and ZnFe2O4: a combined spectroscopic, diffraction and theory study
Source: Royal Society of Chemistry journal article supplement (doi:10.1039/d0cp02322a), 2020-01-01
Supplement: d0cp02322a1.pdf [file d0cp02322a1.pdf]

## Supplemental Information

### (De)lithiation of Spinel Ferrites $\text{Fe}_3\text{O}_4$ , $\text{MgFe}_2\text{O}_4$ , and $\text{ZnFe}_2\text{O}_4$ :

#### A Combined Spectroscopic, Diffraction and Theory Study

*David C. Bock*<sup>1,†</sup>, *Killian R. Tallman*<sup>2,†</sup>, *Haoyue Guo*<sup>2</sup>, *Calvin D. Quilty*<sup>2</sup>, *Shan Yan*<sup>1</sup>, *Paul F. Smith*<sup>2,3</sup>, *Bingjie Zhang*<sup>2</sup>, *Diana M. Lutz*<sup>2,5,6</sup>, *Alison H. McCarthy*<sup>4,7,8</sup>, *Matthew M. Huie*<sup>4</sup>,  
*Veronica Burnett*<sup>4</sup>, *Andrea M. Bruck*<sup>2</sup>, *Amy C. Marschilok*<sup>1,2,4</sup>, *Esther S. Takeuchi*<sup>1,2,4</sup>, *Ping Liu*<sup>1</sup>,  
and *Kenneth J. Takeuchi*<sup>2,4\*</sup>

Email: [kenneth.takeuchi.1@stonybrook.edu](mailto:kenneth.takeuchi.1@stonybrook.edu)

<sup>†</sup>equivalent contributions by D.C.B and K.R.T.

<sup>1</sup>Energy and Photon Sciences Directorate, Brookhaven National Laboratory, Upton, NY 11973

<sup>2</sup>Department of Chemistry, State University of New York at Stony Brook,  
Stony Brook, NY 11794-3400

<sup>3</sup>Present Address: Department of Chemistry, Valparaiso University, Valparaiso, IN 46383-6493

<sup>4</sup>Department of Materials Science and Chemical Engineering, State University of New York at Stony  
Brook, Stony Brook, NY 11794-2275

<sup>5</sup>Department of Chemistry, Elmira College, Elmira, NY 14901

<sup>6</sup>ExCELS Research Experience for Undergraduates, Stony Brook University, Stony Brook, NY 11794-  
3400

<sup>7</sup>Department of Mechanical Engineering, The College of New Jersey, Ewing, NJ 08628

<sup>8</sup>Research Experience for Undergraduates: Nanotechnology for Health, Energy and the Environment,  
Stony Brook University, Stony Brook, NY 11794

**Table S1.** Rietveld refinement of synchrotron XPD data for synthesized samples of Fe<sub>3</sub>O<sub>4</sub>, ZnFe<sub>2</sub>O<sub>4</sub>, and MgFe<sub>2</sub>O<sub>4</sub>.

|                     | Fe <sub>3</sub> O <sub>4</sub> | ZnFe <sub>2</sub> O <sub>4</sub> | MgFe <sub>2</sub> O <sub>4</sub> |                 |
|---------------------|--------------------------------|----------------------------------|----------------------------------|-----------------|
| No. phases          | 1                              | 1                                | 2                                |                 |
| Crystal System      | cubic                          | cubic                            | Phase 1 - cubic                  | Phase 2 - cubic |
| Space Group         | Fd-3m                          | Fd-3m                            | Fd-3m                            | Fd-3m           |
| R <sub>wp</sub> (%) | 3.64                           | 6.35                             | 5.24                             |                 |
| Weight Fraction     | 1                              | 1                                | 0.57                             | 0.43            |
| a = b = c (Å)       | 8.3754(2)                      | 8.4306(2)                        | 8.3683(4)                        | 8.440(6)        |
| Size (nm)           | 9.7(1)                         | 13.2(2)                          | 15.2(2)                          | 2.7(1)          |
| Fe (8a) %           | 100                            | -                                | 75(4)                            |                 |
| Mg (8a) %           | -                              | -                                | 25(4)                            |                 |
| Zn (8a) %           | -                              | 100                              | -                                |                 |
| Fe (16d) %          | 100                            | 100                              | 63(2)                            |                 |
| Mg (16d) %          | -                              | -                                | 37(2)                            |                 |
| Zn (16d) %          | -                              | -                                | -                                |                 |
| O Coord             | 0.25280(3)                     | 0.2588(1)                        | 0.25171(1)                       |                 |

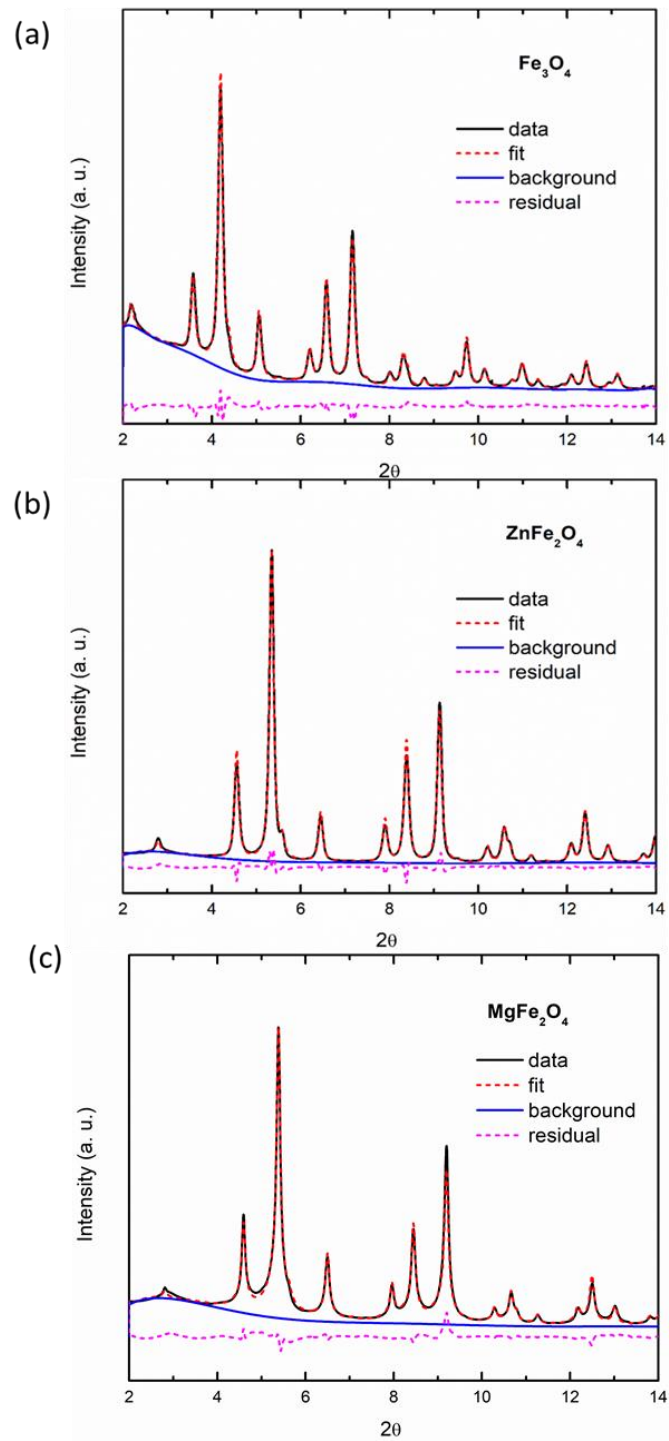

**Figure S1.** Rietveld refinement of synchrotron XPD data for (a)  $\text{Fe}_3\text{O}_4$ , (b)  $\text{ZnFe}_2\text{O}_4$  and (c)  $\text{MgFe}_2\text{O}_4$ .

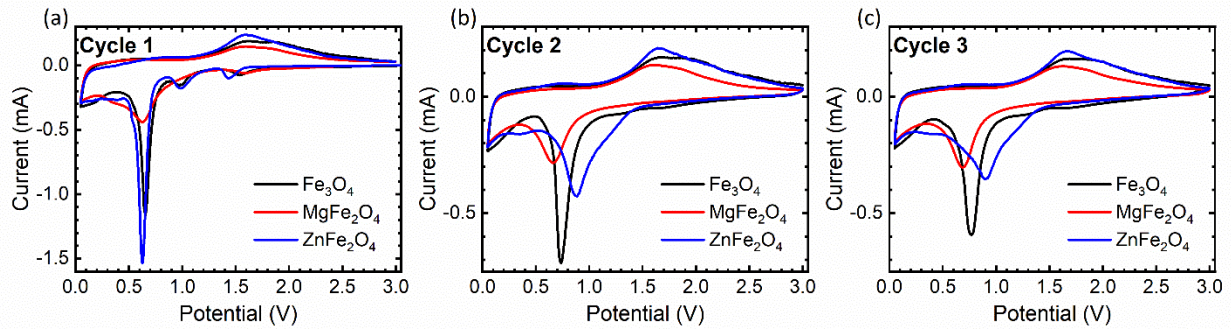

**Figure S2.** Representative current vs. potential cyclic voltammetry profiles for  $\text{Fe}_3\text{O}_4$ ,  $\text{MgFe}_2\text{O}_4$ , and  $\text{ZnFe}_2\text{O}_4$ . Cycles (a) 1, (b) 2, and (c) 3 are shown using a scan rate of 0.1 mV/s between 0.05 – 3.0 V.

**Table S2:** Combined R-factor from EXAFS fits of  $k$ ,  $k^2$  and  $k^3$   $k$ -weights for  $\text{Fe}_3\text{O}_4$ ,  $\text{MgFe}_2\text{O}_4$  and  $\text{ZnFe}_2\text{O}_4$ .

| State                        | $\text{Fe}_3\text{O}_4$ | $\text{MgFe}_2\text{O}_4$ | $\text{ZnFe}_2\text{O}_4$<br>(Fe edge) | $\text{ZnFe}_2\text{O}_4$<br>(Zn edge) |
|------------------------------|-------------------------|---------------------------|----------------------------------------|----------------------------------------|
| unlithiated                  | 0.9                     | 2.1                       | 0.9                                    | 2.7                                    |
| 0.5 e- lithiation            | 1.3                     | 2.0                       | 0.9                                    | 2.6                                    |
| 1 e- lithiation              | 3.9                     | 2.4                       | 0.8                                    | 1.1                                    |
| 2 e- lithiation              | 1.2                     | 2.0                       | 1.1                                    | 1.6                                    |
| 4 e- lithiation              | 0.8                     | 2.1                       | 1.0                                    | 1.6                                    |
| 6 e- lithiation              | 1.9                     | 2.4                       | 1.8                                    | 2.5                                    |
| full lithiation              | 0.7                     | 2.4                       | 3.2                                    | 3.1                                    |
| 4 e- delithiation            | 3.2                     | 2.7                       | 2.1                                    | 0.8                                    |
| full delithiation            | 4.2                     | 5.0                       | 3.4                                    | 0.9                                    |
| 2 <sup>nd</sup> lithiation   | 1.2                     | 1.0                       | 0.7                                    | 1.9                                    |
| 2 <sup>nd</sup> delithiation | 2.9                     | 4.9                       | 2.7                                    | 0.8                                    |

**Table S3:** Fitted  $E_0$  from EXAFS fits of  $k$ ,  $k^2$  and  $k^3$   $k$ -weights for  $\text{Fe}_3\text{O}_4$ ,  $\text{MgFe}_2\text{O}_4$  and  $\text{ZnFe}_2\text{O}_4$ .

| State                        | $\text{Fe}_3\text{O}_4$ | $\text{MgFe}_2\text{O}_4$ | $\text{ZnFe}_2\text{O}_4$<br>(Fe edge) | $\text{ZnFe}_2\text{O}_4$<br>(Zn edge) |
|------------------------------|-------------------------|---------------------------|----------------------------------------|----------------------------------------|
| unlithiated                  | $-1 \pm 1$              | $-5 \pm 1$                | $-5 \pm 1$                             | $6 \pm 2$                              |
| 0.5 e- lithiation            | $2 \pm 1$               | $-5 \pm 1$                | $-1 \pm 1$                             | $6 \pm 1$                              |
| 1 e- lithiation              | $2 \pm 1$               | $-4 \pm 1$                | $-3 \pm 1$                             | $3 \pm 3$                              |
| 2 e- lithiation              | $5 \pm 1$               | $-5 \pm 1$                | $-1 \pm 1$                             | $0 \pm 1$                              |
| 4 e- lithiation              | $3 \pm 1$               | $-5 \pm 2$                | $-2 \pm 1$                             | $2 \pm 1$                              |
| 6 e- lithiation              | $-3 \pm 1$              | $-8 \pm 2$                | $-2 \pm 2$                             | $-2 \pm 1$                             |
| full lithiation              | $2 \pm 1$               | $5 \pm 2$                 | $4 \pm 2$                              | $-5 \pm 2$                             |
| 4 e- delithiation            | $-7 \pm 7$              | $-2 \pm 1$                | $6 \pm 2$                              | $4 \pm 1$                              |
| full delithiation            | $-2 \pm 1$              | $-2 \pm 1$                | $1 \pm 1$                              | $4 \pm 1$                              |
| 2 <sup>nd</sup> lithiation   | $2 \pm 1$               | $5 \pm 1$                 | $4 \pm 1$                              | $-4 \pm 1$                             |
| 2 <sup>nd</sup> delithiation | $-1 \pm 2$              | $-3 \pm 1$                | $-1 \pm 1$                             | $4 \pm 1$                              |

**Table S4:** Debye-Waller factor fit results for Fe<sub>3</sub>O<sub>4</sub>, MgFe<sub>2</sub>O<sub>4</sub> and ZnFe<sub>2</sub>O<sub>4</sub>.

| State                        | Fe <sub>3</sub> O <sub>4</sub>          | MgFe <sub>2</sub> O <sub>4</sub>                              | ZnFe <sub>2</sub> O <sub>4</sub> (Fe edge)                    | ZnFe <sub>2</sub> O <sub>4</sub> (Zn edge)                    |
|------------------------------|-----------------------------------------|---------------------------------------------------------------|---------------------------------------------------------------|---------------------------------------------------------------|
| unlithiated                  | (O) 0.010 ± 0.002<br>(Fe) 0.010 ± 0.002 | (O) 0.01 ± 0.01<br>(Fe) 0.009 ± 0.002<br>(Mg) 0.009 ± 0.002   | (O) 0.005 ± 0.001<br>(Fe) 0.005 ± 0.001<br>(Zn) 0.008 ± 0.002 | (O) 0.006 ± 0.003<br>(Fe) 0.006 ± 0.003<br>(Zn) 0.002 ± 0.004 |
| 0.5 e- lithiation            | (O) 0.010 ± 0.001<br>(Fe) 0.010 ± 0.002 | (O) 0.01 ± 0.01<br>(Fe) 0.008 ± 0.002<br>(Mg) 0.008 ± 0.002   | (O) 0.005 ± 0.001<br>(Fe) 0.005 ± 0.001<br>(Zn) 0.007 ± 0.002 | (O) 0.007 ± 0.003<br>(Fe) 0.007 ± 0.003<br>(Zn) 0.002 ± 0.004 |
| 1 e- lithiation              | (O) 0.010 ± 0.003<br>(Fe) 0.010 ± 0.002 | (O) 0.004 ± 0.004<br>(Fe) 0.008 ± 0.002<br>(Mg) 0.008 ± 0.002 | (O) 0.006 ± 0.002<br>(Fe) 0.007 ± 0.001<br>(Zn) 0.005 ± 0.002 | (O) 0.003 ± 0.005<br>(Fe) 0.007 ± 0.004<br>(Zn) 0.009 ± 0.005 |
| 2 e- lithiation              | (O) 0.010 ± 0.001<br>(Fe) 0.014 ± 0.001 | (O) 0.012 ± 0.002<br>(Fe) 0.012 ± 0.002<br>(Mg) 0.012 ± 0.002 | (O) 0.011 ± 0.002<br>(Fe) 0.01 ± 0.001<br>(Zn) 0.01 ± 0.001   | (O) 0.012 ± 0.002<br>(Fe) 0.012 ± 0.002<br>(Zn) 0.011 ± 0.003 |
| 4 e- lithiation              | (O) 0.01 ± 0.002<br>(Fe) 0.01 ± 0.002   | (O) 0.01 ± 0.003<br>(Fe) 0.01 ± 0.003<br>(Mg) 0.01 ± 0.003    | (O) 0.010 ± 0.002<br>(Fe) 0.011 ± 0.005<br>(Zn) 0.008 ± 0.006 | (O) 0.012 ± 0.002<br>(Fe) 0.013 ± 0.002<br>(Zn) 0.010 ± 0.003 |
| 6 e- lithiation              | (O) 0.004 ± 0.002<br>(Fe) 0.010 ± 0.002 | (O) 0.006 ± 0.003<br>(Mg) 0.006 ± 0.003<br>(Fe) 0.007 ± 0.003 | (O) 0.010 ± 0.003<br>(Fe) 0.013 ± 0.004                       | (O) 0.009 ± 0.002<br>(Fe) 0.011 ± 0.003<br>(Zn) 0.011 ± 0.003 |
| full lithiation              | (Fe) 0.010 ± 0.001                      | (Fe) 0.011 ± 0.003                                            | (Fe) 0.010 ± 0.003                                            | (O) 0.011 ± 0.002<br>(Zn) 0.018 ± 0.002                       |
| 4 e- delithiation            | (O) 0.010 ± 0.09<br>(Fe) 0.012 ± 0.003  | (O) 0.006 ± 0.005<br>(Fe) 0.006 ± 0.005                       | (O) 0.002 ± 0.005<br>(Fe) 0.007 ± 0.002                       | (O) 0.030 ± 0.004<br>(Zn) 0.030 ± 0.004                       |
| full delithiation            | (O) 0.006 ± 0.002<br>(Fe) 0.006 ± 0.002 | (O) 0.007 ± 0.002<br>(Fe) 0.007 ± 0.002                       | (O) 0.007 ± 0.002<br>(Fe) 0.026 ± 0.004                       | (O) 0.016 ± 0.002<br>(Zn) 0.016 ± 0.002                       |
| 2 <sup>nd</sup> lithiation   | (Fe) 0.010 ± 0.002                      | (Fe) 0.010 ± 0.002                                            | (Fe) 0.009 ± 0.002                                            | (O) 0.010 ± 0.001<br>(Zn) 0.018 ± 0.001                       |
| 2 <sup>nd</sup> delithiation | (O) 0.008 ± 0.005<br>(Fe) 0.007 ± 0.005 | (O) 0.008 ± 0.005<br>(Fe) 0.008 ± 0.005                       | (O) 0.012 ± 0.003<br>(Fe) 0.023 ± 0.004                       | (O) 0.004 ± 0.001<br>(Zn) 0.014 ± 0.009                       |

**Table S5:** EXAFS fitting results for interatomic distances for Fe<sub>3</sub>O<sub>4</sub>. Paths associated with the Fe<sub>3</sub>O<sub>4</sub>, FeO, and Fe metal structures are highlighted in red, blue, and green, respectively. Fe-O paths which are not part of the Fe<sub>3</sub>O<sub>4</sub>, FeO, or Fe metal structures but were utilized in the model are highlighted in orange.

| State                        | Tetrahedral Iron |             | Octahedral Iron |             |             |                 |
|------------------------------|------------------|-------------|-----------------|-------------|-------------|-----------------|
|                              | Fe-O (Å)         | Fe-Fe (Å)   | Fe-O (Å)        | Fe-Fe (Å)   | Fe-O (Å)    | Fe-Fe Metal (Å) |
| unlithiated                  | 1.93 ± 0.01      | 3.48 ± 0.02 | 1.98 ± 0.01     | 3.01 ± 0.01 |             |                 |
|                              | 3.61 ± 0.08      | 3.63 ± 0.02 |                 | 3.48 ± 0.02 |             |                 |
| 0.5 e- lithiation            | 1.92 ± 0.01      | 3.48 ± 0.01 | 2.00 ± 0.01     | 3.00 ± 0.01 |             |                 |
|                              | 3.55 ± 0.05      | 3.63 ± 0.01 |                 | 3.48 ± 0.01 |             |                 |
| 1 e- lithiation              | 1.94 ± 0.01      | 3.49 ± 0.01 | 2.04 ± 0.01     | 3.02 ± 0.01 |             |                 |
|                              | 3.62 ± 0.01      | 3.64 ± 0.01 |                 | 3.47 ± 0.01 |             |                 |
| 2 e- lithiation              |                  |             | 2.08 ± 0.01     | 3.06 ± 0.01 |             |                 |
|                              |                  |             | 3.73 ± 0.04     |             |             |                 |
| 4 e- lithiation              |                  |             | 2.06 ± 0.01     | 3.04 ± 0.01 |             |                 |
|                              |                  |             | 3.62 ± 0.03     |             |             |                 |
| 6 e- lithiation              |                  |             | 2.04 ± 0.01     | 3.09 ± 0.02 |             | 2.54 ± 0.02     |
|                              |                  |             | 3.65 ± 0.05     |             |             | 2.93 ± 0.02     |
| full lithiation              |                  |             |                 |             |             | 2.45 ± 0.01     |
|                              |                  |             |                 |             |             | 2.81 ± 0.01     |
| 4 e- delithiation            |                  |             | 1.83 ± 0.06     | 2.79 ± 0.06 |             | 2.47 ± 0.04     |
|                              |                  |             |                 |             |             | 2.79 ± 0.16     |
| full delithiation            |                  |             | 1.93 ± 0.01     | 3.05 ± 0.03 | 3.21 ± 0.05 |                 |
| 2 <sup>nd</sup> lithiation   |                  |             |                 |             |             | 2.46 ± 0.01     |
|                              |                  |             |                 |             |             | 2.81 ± 0.01     |
| 2 <sup>nd</sup> delithiation |                  |             | 1.94 ± 0.02     | 3.17 ± 0.06 |             | 2.53 ± 0.04     |

**Table S6:** EXAFS fitting results for the near neighbors for Fe<sub>3</sub>O<sub>4</sub>. Paths associated with the Fe<sub>3</sub>O<sub>4</sub>, FeO, and Fe metal structures are highlighted in red, blue, and green, respectively. Fe-O paths which are not part of the Fe<sub>3</sub>O<sub>4</sub>, FeO, or Fe metal structures but were utilized in the model are highlighted in orange.

| State                        | Tetrahedral Iron |           | Octahedral Iron        |           | Fe-O      | Fe-Fe Metal             |
|------------------------------|------------------|-----------|------------------------|-----------|-----------|-------------------------|
|                              | Fe-O             | Fe-Fe     | Fe-O                   | Fe-Fe     |           |                         |
| Unlithiated                  | 1.2 ± 0.2        | 3.5 ± 0.5 | 3.5 ± 0.4              | 3.5 ± 0.4 |           |                         |
|                              | 3.5 ± 0.5        | 1.2 ± 0.2 |                        | 3.5 ± 0.4 |           |                         |
| 0.5 e- Lithiation            | 1.2 ± 0.1        | 3.7 ± 0.3 | 3.7 ± 0.4              | 3.7 ± 0.4 |           |                         |
|                              | 3.7 ± 0.3        | 1.2 ± 0.1 |                        | 3.7 ± 0.4 |           |                         |
| 1 e- Lithiation              | 1.2 ± 0.1        | 3.6 ± 0.3 | 3.6 ± 0.4              | 3.6 ± 0.4 |           |                         |
|                              | 3.6 ± 0.3        | 1.2 ± 0.1 |                        | 3.6 ± 0.4 |           |                         |
| 2 e- Lithiation              |                  |           | 4.7 ± 0.4<br>4.7 ± 0.4 | 9.4 ± 0.7 |           |                         |
| 4 e- Lithiation              |                  |           | 3.8 ± 0.2<br>3.8 ± 0.2 | 7.5 ± 0.5 |           |                         |
| 6 e- Lithiation              |                  |           | 1.6 ± 0.2<br>1.6 ± 0.2 | 3.4 ± 0.5 |           | 1.5 ± 0.4<br>1.5 ± 0.4  |
|                              |                  |           |                        |           |           | 5.2 ± 0.7<br>2.1 ± 0.6  |
| 4 e- delithiation            |                  |           | 1.5 ± 0.8              | 1.3 ± 0.7 |           | 4.6 ± 1.5<br>0.7 ± 0.3  |
| Full delithiation            |                  |           | 2.4 ± 0.2              | 1.9 ± 0.3 | 0.4 ± 0.3 |                         |
| 2 <sup>nd</sup> lithiation   |                  |           |                        |           |           | 5.2 ± 0.9<br>2.49 ± 0.9 |
| 2 <sup>nd</sup> delithiation |                  |           | 2.4 ± 0.5              | 0.8 ± 0.6 |           | 1.1 ± 0.6               |



**Table S7:** EXAFS fitting results for the interatomic distances for MgFe<sub>2</sub>O<sub>4</sub>. Paths associated with the MgFe<sub>2</sub>O<sub>4</sub> structure, a modified structure with all Fe and Mg ions in octahedral sites, and the Fe metal structure, and the FeO structure are highlighted in red, blue, and green, and yellow respectively. Additional Fe-O paths which are not part of these three structures but were utilized in the models are highlighted in orange.

| State                        | Tetrahedral Iron           |                            |             | Octahedral Iron            |                            |             |             |                            |
|------------------------------|----------------------------|----------------------------|-------------|----------------------------|----------------------------|-------------|-------------|----------------------------|
|                              | Fe-O (Å)                   | Fe-Fe (Å)                  | Fe-Mg (Å)   | Fe-O (Å)                   | Fe-Fe (Å)                  | Fe-Mg (Å)   | Fe-O (Å)    | Fe-Fe Metal (Å)            |
| unlithiated                  | 1.83 ± 0.01<br>3.47 ± 0.01 | 3.46 ± 0.01<br>3.61 ± 0.01 | 3.46 ± 0.01 | 1.97 ± 0.01<br>3.64 ± 0.01 | 2.94 ± 0.01<br>3.46 ± 0.01 | 2.94 ± 0.01 |             |                            |
| 0.5 e-lithiation             | 1.84 ± 0.01<br>3.47 ± 0.02 | 3.46 ± 0.02<br>3.61 ± 0.02 | 3.46 ± 0.02 | 1.99 ± 0.01<br>3.64 ± 0.01 | 2.94 ± 0.02<br>3.46 ± 0.02 | 2.94 ± 0.02 |             |                            |
| 1 e-lithiation               | 1.88 ± 0.03<br>3.47 ± 0.02 | 3.46 ± 0.02<br>3.60 ± 0.02 | 3.46 ± 0.02 | 2.02 ± 0.03<br>3.63 ± 0.02 | 2.94 ± 0.02<br>3.46 ± 0.02 | 2.94 ± 0.02 |             |                            |
| 2 e-lithiation               |                            |                            |             | 2.06 ± 0.02<br>3.67 ± 0.05 | 3.05 ± 0.01                | 3.05 ± 0.01 |             |                            |
| 4 e-lithiation               |                            |                            |             | 2.06 ± 0.01<br>3.68 ± 0.06 | 3.07 ± 0.02                | 3.07 ± 0.02 |             | 2.54 ± 0.02<br>2.92 ± 0.02 |
| 6 e-lithiation               |                            |                            |             | 2.00 ± 0.02<br>3.60 ± 0.08 | 3.06 ± 0.02                | 3.06 ± 0.02 |             | 2.52 ± 0.02<br>2.90 ± 0.02 |
| full lithiation              |                            |                            |             |                            |                            |             |             | 2.49 ± 0.02<br>2.79 ± 0.04 |
| 4 e-delithiation             |                            |                            |             | 1.92 ± 0.01                | 3.15 ± 0.06                |             |             | 2.53 ± 0.02                |
| full delithiation            |                            |                            |             | 2.00 ± 0.01                | 3.04 ± 0.03                |             | 3.10 ± 0.03 |                            |
| 2 <sup>nd</sup> lithiation   |                            |                            |             |                            |                            |             |             | 2.48 ± 0.01<br>2.80 ± 0.02 |
| 2 <sup>nd</sup> delithiation |                            |                            |             | 1.98 ± 0.01                | 3.03 ± 0.05                |             | 3.12 ± 0.09 |                            |

**Table S8:** EXAFS fitting results for the coordination numbers for MgFe<sub>2</sub>O<sub>4</sub>. Paths associated with the MgFe<sub>2</sub>O<sub>4</sub> structure, a modified structure with all Fe and Mg ions in octahedral sites, and the Fe metal structure, and the FeO structure are highlighted in red, blue, and green, and yellow respectively. Additional Fe-O paths which are not part of these three structures but were utilized in the models are highlighted in orange.

| State                        | Tetrahedral Iron |           |           | Octahedral Iron        |           |           | Fe-O (Å)  | Fe-Fe Metal (Å)        |
|------------------------------|------------------|-----------|-----------|------------------------|-----------|-----------|-----------|------------------------|
|                              | Fe-O             | Fe-Fe     | Fe-Mg     | Fe-O                   | Fe-Fe     | Fe-Mg     |           |                        |
| unlithiated                  | 1.1 ± 0.1        | 1.6 ± 0.2 | 1.6 ± 0.2 | 3.3 ± 0.4              | 1.6 ± 0.2 | 1.6 ± 0.2 |           |                        |
|                              | 3.2 ± 0.4        | 1.1 ± 0.1 |           | 3.3 ± 0.4              | 4.9 ± 0.4 |           |           |                        |
| 0.5 e-lithiation             | 1.1 ± 0.1        | 1.6 ± 0.2 | 1.6 ± 0.2 | 3.3 ± 0.4              | 1.7 ± 0.2 | 1.7 ± 0.2 |           |                        |
|                              | 3.3 ± 0.4        | 1.1 ± 0.1 |           | 3.3 ± 0.4              | 3.3 ± 0.4 |           |           |                        |
| 1 e-lithiation               | 1.0 ± 0.3        | 1.5 ± 0.4 | 1.5 ± 0.4 | 3.0 ± 0.8              | 1.5 ± 0.4 | 1.5 ± 0.6 |           |                        |
|                              | 3.0 ± 0.8        | 0.8 ± 0.2 |           | 3.0 ± 0.8              | 3.0 ± 0.8 |           |           |                        |
| 2 e-lithiation               |                  |           |           | 4.3 ± 0.5<br>4.3 ± 0.5 | 5.7 ± 0.7 | 2.9 ± 0.4 |           |                        |
| 4 e-lithiation               |                  |           |           | 2.9 ± 0.5              | 3.8 ± 0.6 | 1.9 ± 0.3 |           | 1.2 ± 0.4              |
|                              |                  |           |           | 2.9 ± 0.5              |           |           | 0.9 ± 0.3 |                        |
| 6 e-lithiation               |                  |           |           | 1.6 ± 0.4              | 2.1 ± 0.5 | 1.0 ± 0.2 |           | 1.4 ± 0.5              |
|                              |                  |           |           | 1.6 ± 0.4              |           |           | 1.1 ± 0.4 |                        |
| full lithiation              |                  |           |           |                        |           |           |           | 4.7 ± 1.3<br>1.6 ± 1.1 |
| 4 e-delithiation             |                  |           |           | 1.7 ± 0.4              | 0.5 ± 0.4 |           |           | 1.1 ± 0.5              |
| full delithiation            |                  |           |           | 2.1 ± 0.3              | 0.7 ± 0.3 |           | 2.1 ± 0.4 |                        |
| 2 <sup>nd</sup> lithiation   |                  |           |           |                        |           |           |           | 5.0 ± 0.9<br>1.8 ± 0.9 |
| 2 <sup>nd</sup> delithiation |                  |           |           | 2.4 ± 0.7              | 1.0 ± 0.9 |           | 2.3 ± 0.4 |                        |

**Table S9:** EXAFS fitting results for the interatomic distances for ZnFe<sub>2</sub>O<sub>4</sub> (Fe edge). Paths associated with the ZnFe<sub>2</sub>O<sub>4</sub> structure, a modified structure with all Zn and Fe ions in octahedral sites, the FeO structure, and the Fe metal structure are highlighted in red, blue, orange and green, respectively.

| State                        | Octahedral Iron            |             |                            | Fe-Fe Metal (Å)            |
|------------------------------|----------------------------|-------------|----------------------------|----------------------------|
|                              | Fe-O (Å)                   | Fe-Fe (Å)   | Fe-Zn (Å)                  |                            |
| unlithiated                  | 2.01 ± 0.01<br>3.55 ± 0.04 | 3.00 ± 0.01 | 3.47 ± 0.01                |                            |
| 0.5 e-lithiation             | 2.01 ± 0.01<br>3.58 ± 0.04 | 3.00 ± 0.01 | 3.48 ± 0.01                |                            |
| 1 e-lithiation               | 2.02 ± 0.01<br>3.56 ± 0.01 | 2.99 ± 0.01 | 3.45 ± 0.02<br>2.99 ± 0.01 |                            |
| 2 e-lithiation               | 2.05 ± 0.01<br>3.61 ± 0.03 | 3.03 ± 0.01 | 3.03 ± 0.01                |                            |
| 4 e-lithiation               | 2.05 ± 0.01<br>3.59 ± 0.04 | 3.02 ± 0.01 | 3.02 ± 0.01                |                            |
| 6 e-lithiation               | 1.97 ± 0.02<br>3.37 ± 0.05 | 2.97 ± 0.02 | 2.97 ± 0.02                | 2.52 ± 0.02<br>2.90 ± 0.02 |
| full lithiation              |                            |             |                            | 2.48 ± 0.02<br>2.86 ± 0.09 |
| 4 e-delithiation             | 1.87 ± 0.02<br>3.45 ± 0.02 | 2.88 ± 0.08 |                            | 2.48 ± 0.03<br>2.68 ± 0.08 |
| full delithiation            | 1.90 ± 0.01<br>3.49 ± 0.01 | 3.15 ± 0.03 |                            |                            |
| 2 <sup>nd</sup> lithiation   |                            |             |                            | 2.47 ± 0.01<br>2.80 ± 0.03 |
| 2 <sup>nd</sup> delithiation | 1.89 ± 0.01<br>3.48 ± 0.01 | 3.14 ± 0.03 |                            |                            |

**Table S10:** EXAFS fitting results for the interatomic distances for  $\text{ZnFe}_2\text{O}_4$  (Fe edge). Paths associated with the  $\text{ZnFe}_2\text{O}_4$  structure, a modified structure with all Zn and Fe ions in octahedral sites, the FeO structure, and the Fe metal structure are highlighted in red, blue, orange and green, respectively.

| State                        | Octahedral Iron                |               |                                | Fe-Fe Metal (Å)                |
|------------------------------|--------------------------------|---------------|--------------------------------|--------------------------------|
|                              | Fe-O                           | Fe-Fe         | Fe-Zn                          |                                |
| unlithiated                  | $5.0 \pm 0.4$<br>$6.6 \pm 0.5$ | $5.0 \pm 0.4$ | $5.0 \pm 0.4$                  |                                |
| 0.5 e-lithiation             | $5.0 \pm 0.4$<br>$6.6 \pm 0.5$ | $5.0 \pm 0.4$ | $5.0 \pm 0.4$                  |                                |
| 1 e-lithiation               | $4.6 \pm 0.4$<br>$6.1 \pm 0.5$ | $4.6 \pm 0.4$ | $2.5 \pm 0.4$<br>$1.2 \pm 0.4$ |                                |
| 2 e-lithiation               | $4.9 \pm 0.4$<br>$6.6 \pm 0.5$ | $4.9 \pm 0.4$ | $2.5 \pm 0.2$                  |                                |
| 4 e-lithiation               | $4.6 \pm 0.5$<br>$6.1 \pm 0.6$ | $4.6 \pm 0.5$ | $2.3 \pm 0.3$                  |                                |
| 6 e-lithiation               | $1.9 \pm 0.4$<br>$2.5 \pm 0.6$ | $1.9 \pm 0.4$ | $0.9 \pm 0.2$                  | $2.7 \pm 1.2$<br>$2.0 \pm 0.9$ |
| full lithiation              |                                |               |                                | $4.3 \pm 1.7$<br>$3.2 \pm 1.3$ |
| 4 e-delithiation             | $0.8 \pm 0.2$<br>$1.1 \pm 0.3$ | $1.6 \pm 0.5$ |                                | $3.4 \pm 0.8$<br>$2.5 \pm 0.6$ |
| full delithiation            | $2.6 \pm 0.3$<br>$3.5 \pm 0.4$ | $5.2 \pm 0.6$ |                                |                                |
| 2 <sup>nd</sup> lithiation   |                                |               |                                | $4.6 \pm 0.7$<br>$3.4 \pm 0.6$ |
| 2 <sup>nd</sup> delithiation | $3.8 \pm 0.4$<br>$5.1 \pm 0.6$ | $4.8 \pm 0.9$ |                                |                                |

**Table S11:** EXAFS fitting results for the interatomic distances for ZnFe<sub>2</sub>O<sub>4</sub> (Zn edge). Paths associated with the ZnFe<sub>2</sub>O<sub>4</sub> structure, a modified structure with all Fe and Zn ions in octahedral sites, the Zn metal structure, and the ZnO structure are highlighted in red, blue, and green, and yellow respectively. Additional Zn-O paths which are not part of these structures but were utilized in the models are highlighted in orange.

| State                        | Tetrahedral Zn             |             |             | Octahedral Zn              |             |             | Zn-O (Å)    | Zn-Zn Metal (Å) |
|------------------------------|----------------------------|-------------|-------------|----------------------------|-------------|-------------|-------------|-----------------|
|                              | Zn-O (Å)                   | Zn-Fe (Å)   | Zn-Zn (Å)   | Zn-O (Å)                   | Zn-Fe (Å)   | Zn-Zn (Å)   |             |                 |
| unlithiated                  | 2.00 ± 0.02<br>3.49 ± 0.05 | 3.50 ± 0.02 | 3.65 ± 0.03 |                            |             |             |             |                 |
| 0.5 e-lithiation             | 1.99 ± 0.02<br>3.49 ± 0.05 | 3.51 ± 0.02 | 3.65 ± 0.03 |                            |             |             |             |                 |
| 1 e-lithiation               | 1.96 ± 0.06<br>3.49 ± 0.1  | 3.50 ± 0.09 | 3.64 ± 0.09 | 2.07 ± 0.06<br>3.85 ± 0.01 | 3.03 ± 0.03 | 3.03 ± 0.03 |             |                 |
| 2 e-lithiation               |                            |             |             | 2.05 ± 0.01<br>3.51 ± 0.04 | 3.02 ± 0.01 | 3.02 ± 0.01 |             |                 |
| 4 e-lithiation               |                            |             |             | 2.06 ± 0.01<br>3.61 ± 0.06 | 3.03 ± 0.01 | 3.03 ± 0.01 |             |                 |
| 6 e-lithiation               |                            |             |             | 2.04 ± 0.02<br>3.60 ± 0.05 | 3.05 ± 0.02 | 3.05 ± 0.02 |             |                 |
| full lithiation              |                            |             |             |                            |             |             | 1.92 ± 0.02 | 2.51 ± 0.02     |
| 4 e-delithiation             |                            |             |             | 1.96 ± 0.01<br>3.76 ± 0.04 |             | 3.24 ± 0.05 |             |                 |
| full delithiation            |                            |             |             | 1.96 ± 0.01<br>3.76 ± 0.03 |             | 3.21 ± 0.02 |             |                 |
| 2 <sup>nd</sup> lithiation   |                            |             |             |                            |             |             | 1.93 ± 0.01 | 2.51 ± 0.01     |
| 2 <sup>nd</sup> delithiation |                            |             |             | 1.96 ± 0.01<br>3.75 ± 0.03 |             | 3.21 ± 0.01 |             |                 |

**Table S12:** EXAFS fitting results for the interatomic distances for ZnFe<sub>2</sub>O<sub>4</sub> (Zn edge). Paths associated with the ZnFe<sub>2</sub>O<sub>4</sub> structure, a modified structure with all Fe and Zn ions in octahedral sites, the Zn metal structure, and the ZnO structure are highlighted in red, blue, and green, and yellow respectively. Additional Zn-O paths which are not part of these structures but were utilized in the models are highlighted in orange.

| State                        | Tetrahedral Zn         |           |           | Octahedral Zn          |           |           | Zn-O (Å)  | Zn-Zn Metal (Å) |
|------------------------------|------------------------|-----------|-----------|------------------------|-----------|-----------|-----------|-----------------|
|                              | Zn-O                   | Zn-Fe     | Zn-Zn     | Zn-O                   | Zn-Fe     | Zn-Zn     |           |                 |
| unlithiated                  | 2.9 ± 0.5<br>8.6 ± 1.5 | 8.6 ± 1.5 | 2.9 ± 0.5 |                        |           |           |           |                 |
| 0.5 e-lithiation             | 2.9 ± 0.5<br>8.6 ± 1.5 | 8.6 ± 1.5 | 2.9 ± 0.5 |                        |           |           |           |                 |
| 1 e-lithiation               | 1.6 ± 0.8<br>4.7 ± 2.4 | 4.7 ± 2.4 | 1.6 ± 0.8 | 2.0 ± 1.4<br>2.6 ± 1.9 | 2.0 ± 1.4 | 1.0 ± 0.7 |           |                 |
| 2 e-lithiation               |                        |           |           | 5.0 ± 0.5<br>6.6 ± 0.7 | 5.0 ± 0.5 | 2.5 ± 0.3 |           |                 |
| 4 e-lithiation               |                        |           |           | 4.9 ± 0.5<br>6.5 ± 0.7 | 4.9 ± 0.5 | 2.4 ± 0.3 |           |                 |
| 6 e-lithiation               |                        |           |           | 3.4 ± 0.4<br>4.5 ± 0.5 | 1.0 ± 0.5 | 1.7 ± 0.2 |           |                 |
| full lithiation              |                        |           |           |                        |           |           | 1.1 ± 0.2 | 4.0 ± 0.2       |
| 4 e-delithiation             |                        |           |           | 2.7 ± 0.2<br>6.1 ± 0.4 |           | 4.1 ± 0.2 |           |                 |
| full delithiation            |                        |           |           | 2.8 ± 0.2<br>6.4 ± 0.4 |           | 4.2 ± 0.3 |           |                 |
| 2 <sup>nd</sup> lithiation   |                        |           |           |                        |           |           | 1.4 ± 0.2 | 4.0 ± 0.2       |
| 2 <sup>nd</sup> delithiation |                        |           |           | 2.9 ± 0.2<br>6.5 ± 0.5 |           | 4.3 ± 0.3 |           |                 |

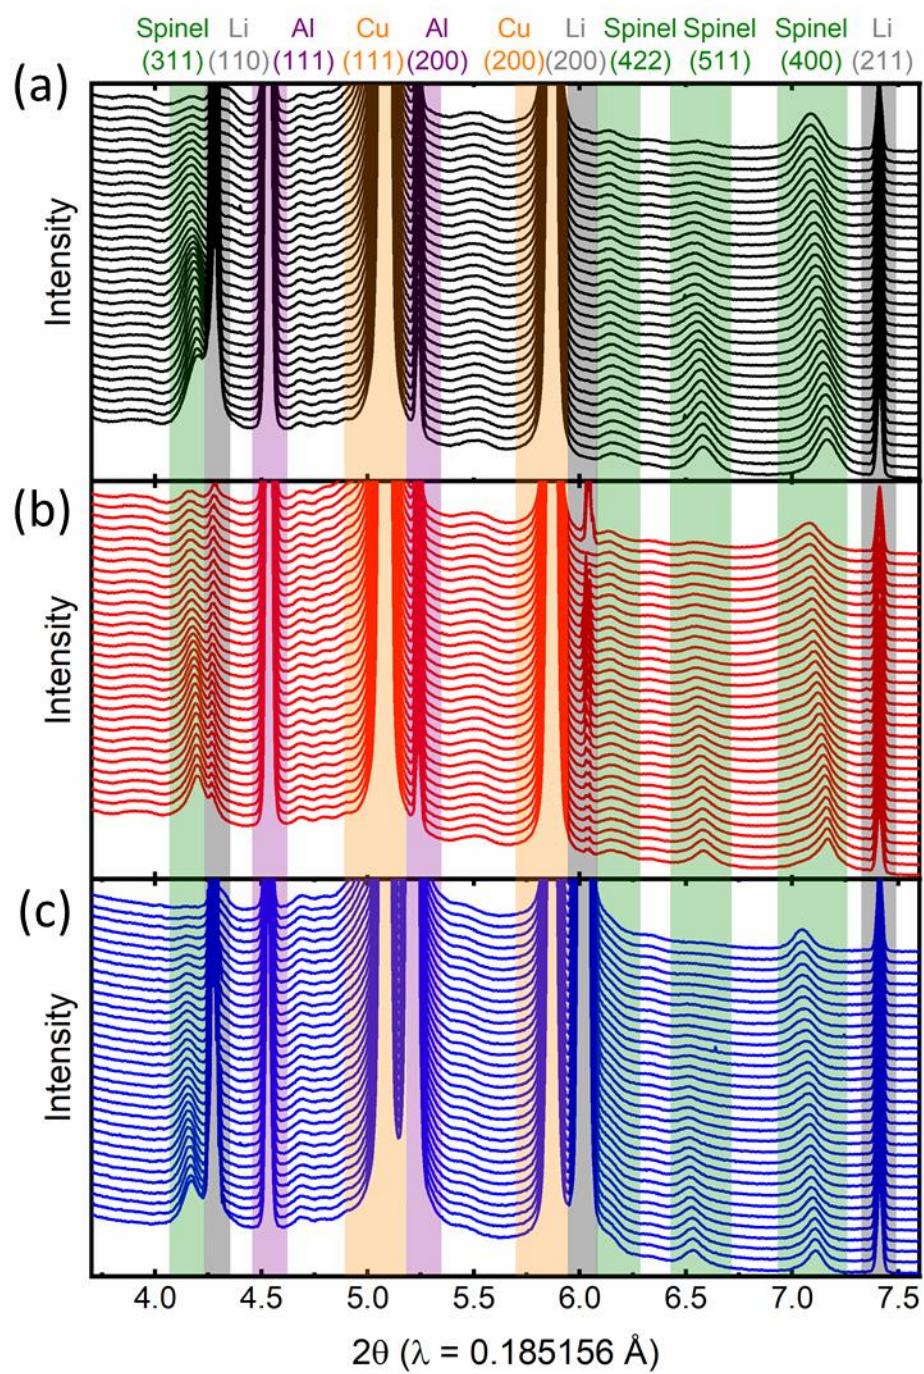

**Figure S3.** *Operando* synchrotron XRD (a)  $\text{Fe}_3\text{O}_4$ , (b)  $\text{MgFe}_2\text{O}_4$ , and (c)  $\text{ZnFe}_2\text{O}_4$ . All peaks are indexed to the following phases: spinel, Li metal, Cu metal, and Al metal.

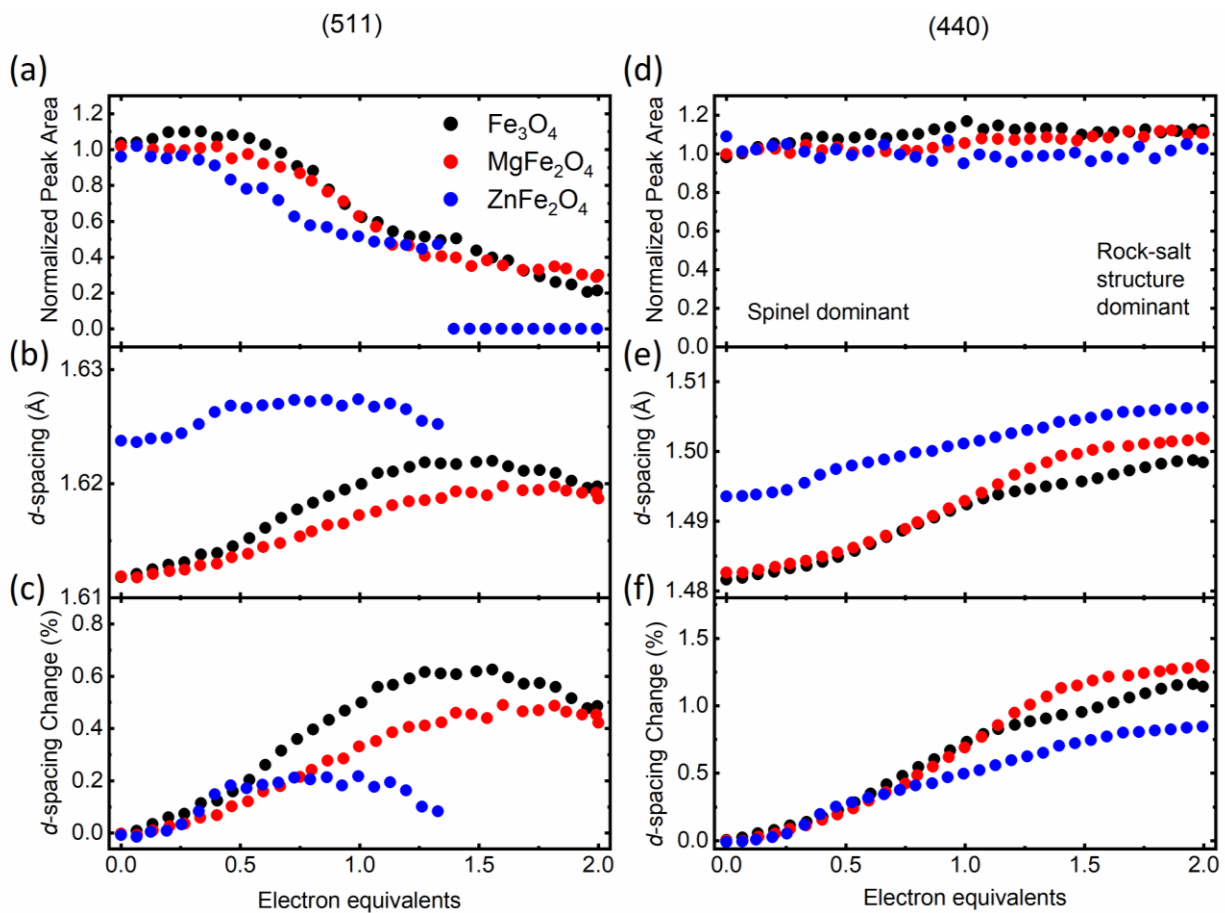

**Figure S4.** (a, d) Normalized peak areas, (b, e) d-spacing, and (c, f) d-spacing change for (a,b,c) (511) and (d,e,f) (440) reflections from *operando* synchrotron XRD data.



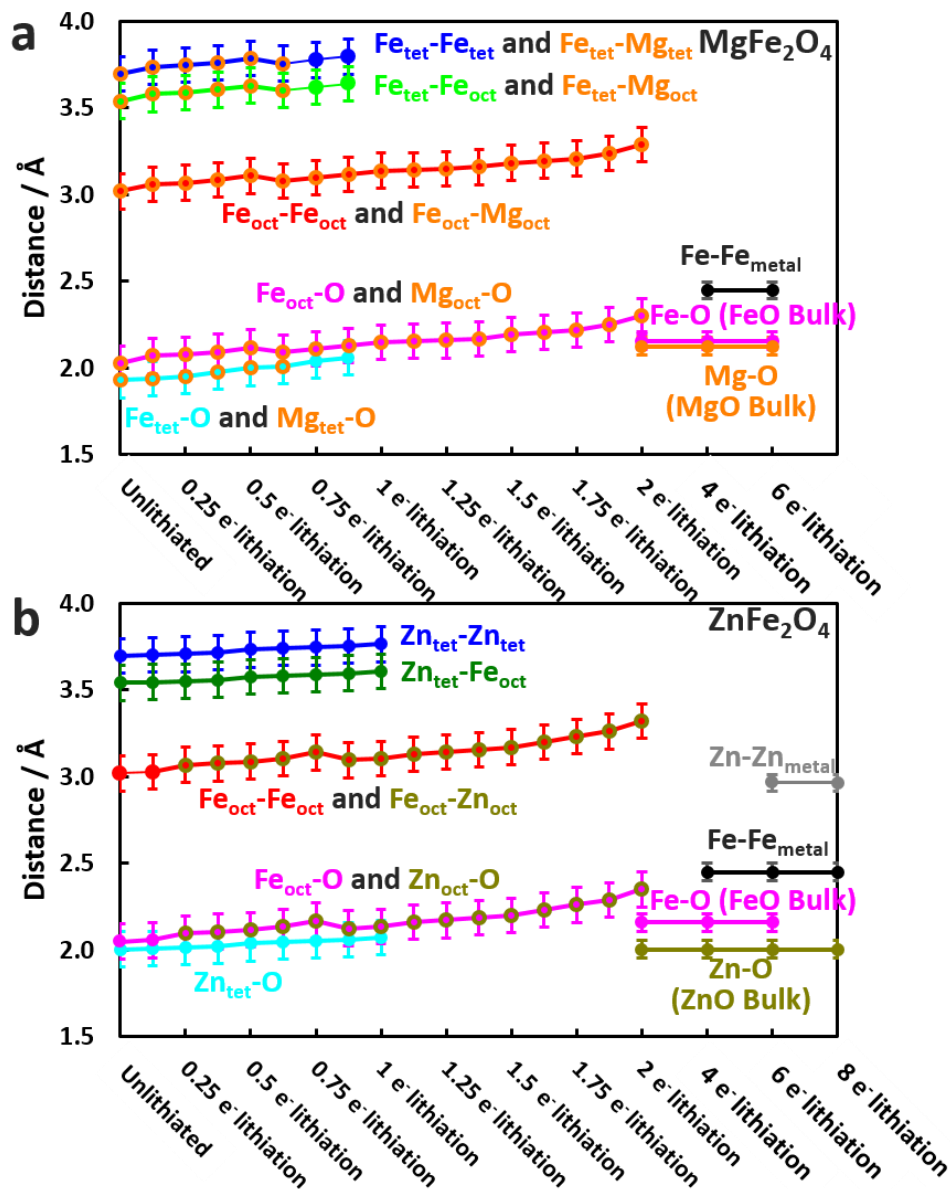

**Figure S5.** (a) Distances of nearest-neighbors  $\text{Fe(Mg)}_{\text{tet}}-\text{Fe(Mg)}_{\text{tet}}$ ,  $\text{Fe(Mg)}_{\text{tet}}-\text{Fe(Mg)}_{\text{oct}}$ ,  $\text{Fe(Mg)}_{\text{oct}}-\text{Fe(Mg)}_{\text{oct}}$ ,  $\text{Fe(Mg)}_{\text{oct}}-\text{O}$ ,  $\text{Fe(Mg)}_{\text{tet}}-\text{O}$  in  $\text{MgFe}_2\text{O}_4$  at different lithiation stage and  $\text{Fe}-\text{O}$  in  $\text{FeO}$  bulk,  $\text{Mg}-\text{O}$  in  $\text{MgO}$  bulk,  $\text{Fe}-\text{Fe}_{\text{metal}}$  in metallic  $\text{Fe}$  bulk structures to describe the lithiation states after phase separation. (b) Distances of nearest-neighbors  $\text{Zn}_{\text{tet}}-\text{Zn}_{\text{tet}}$ ,  $\text{Zn}_{\text{tet}}-\text{Fe}_{\text{oct}}$ ,  $\text{Fe(Zn)}_{\text{oct}}-\text{Fe(Zn)}_{\text{oct}}$ ,  $\text{Fe(Zn)}_{\text{oct}}-\text{O}$ ,  $\text{Zn}_{\text{tet}}-\text{O}$  in  $\text{ZnFe}_2\text{O}_4$  at different lithiation stage and  $\text{Fe}-\text{O}$  in  $\text{FeO}$  bulk,  $\text{Zn}-\text{O}$  in  $\text{ZnO}$  bulk,  $\text{Fe}-\text{Fe}_{\text{metal}}$  in metallic  $\text{Fe}$  bulk,  $\text{Zn}-\text{Zn}_{\text{metal}}$  in metallic  $\text{Zn}$  bulk structures to describe the lithiation states after phase separation.

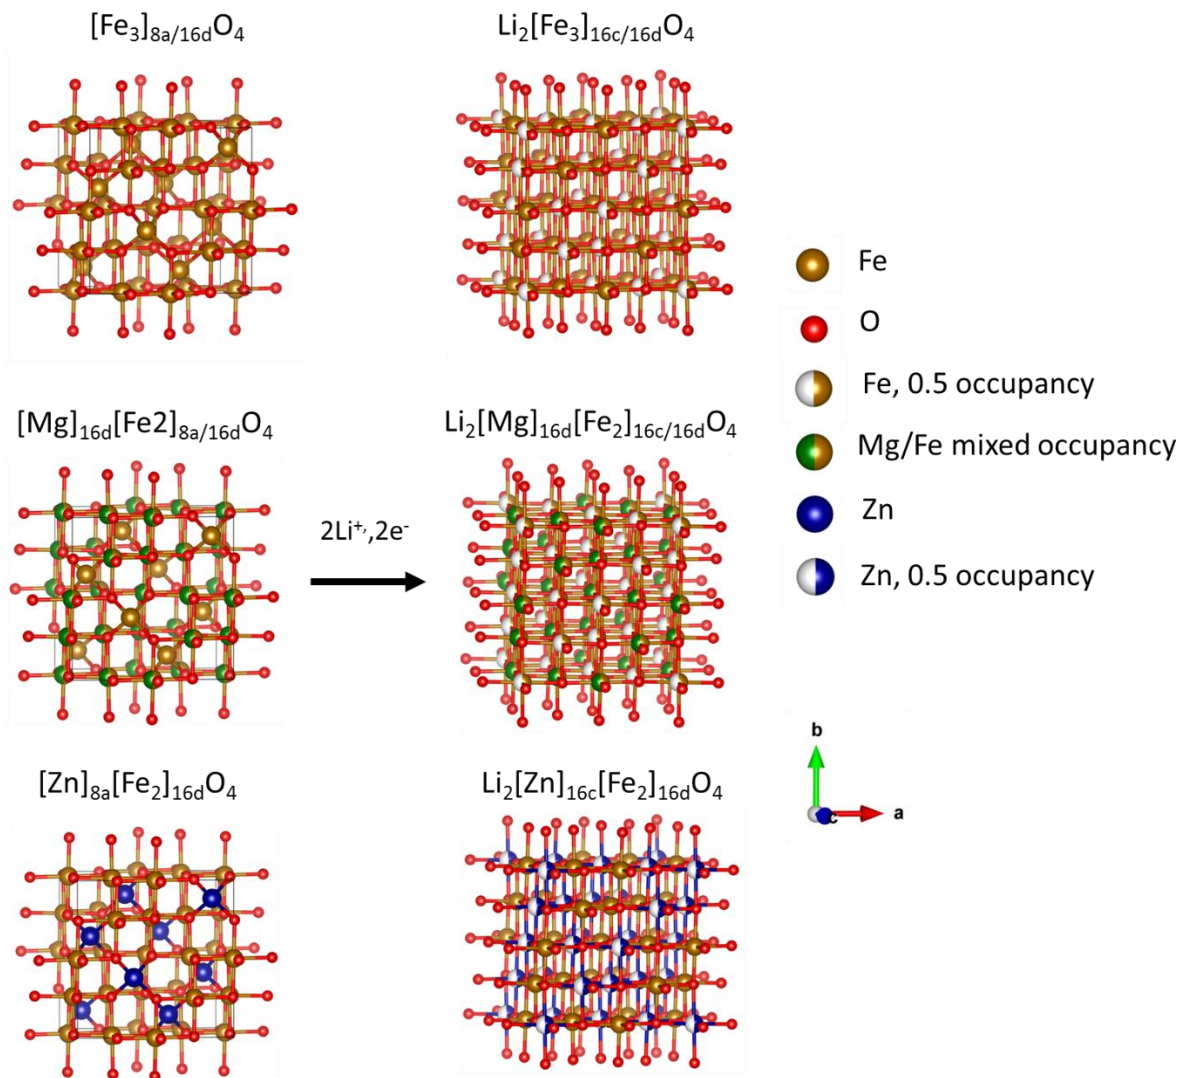

**Figure S6.** Structures of  $\text{Fe}_3\text{O}_4$ ,  $\text{MgFe}_2\text{O}_4$ , and  $\text{ZnFe}_2\text{O}_4$  electrode materials in the un lithiated state and after  $2\text{e}^-$  of lithiation.
